# Supplementary material for: Narrowing the gap: from semiconductor to semimetal in the homologous series of rare-earth zinc arsenides RE2−yZn4As4·n(REAs) and Mn-substituted derivatives RE2−yMnxZn4−xAs4·n(REAs) (RE = La–Nd, Sm, Gd)
Source: Royal Society of Chemistry journal article supplement (doi:10.1039/c5dt03596a), 2015-01-01
Supplement: c5dt03596a10.pdf [file c5dt03596a10.pdf]

## SUPPLEMENTARY INFORMATION

### **Narrowing the gap: From semiconductor to semimetal in the homologous series of rare-earth zinc arsenides $RE_{2-y}Zn_4As_4 \cdot n(REAs)$ and Mn-substituted derivatives $RE_{2-y}Mn_xZn_{4-x}As_4 \cdot n(REAs)$ ( $RE = La-Nd, Sm, Gd$ )**

Xinsong Lin, Danisa Tabassum, and Arthur Mar\*

*Department of Chemistry, University of Alberta, Edmonton, Alberta, Canada T6G 2G2*

**Table S1.** EDX analyses of  $RE_{2-y}Mn_xZn_{4-x}As_4 \cdot n(REAs)$  ( $RE = La-Nd, Sm, Gd$ ;  $n = 2, 3, 4$ ) crystals.

**Table S2.** Crystallographic data for  $RE_{2-y}Mn_xZn_{4-x}As_4 \cdot n(REAs)$  ( $n = 2, 3, 4$ ).

**Table S3.** Atomic coordinates and equivalent isotropic displacement parameters for  $RE_{2-y}Mn_xZn_{4-x}As_4 \cdot n(REAs)$  ( $n = 2, 3, 4$ ).

**Table S4.** Interatomic distances (Å) for  $RE_{2-y}Mn_xZn_{4-x}As_4 \cdot n(REAs)$  ( $n = 2, 3, 4$ ).

**Figure S1.** Powder XRD patterns for  $RE_{4-y}Zn_4As_6$  ( $RE = La-Nd$ ).

**Figure S2.** Powder XRD patterns for  $RE_{5-y}Zn_4As_7$  ( $RE = Pr, Nd, Sm, Gd$ ).

**Figure S3.** Powder XRD patterns for  $RE_{6-y}Zn_4As_8$  ( $RE = La-Nd, Sm, Gd$ ).

---

\* *Department of Chemistry, University of Alberta, Edmonton, Alberta, Canada T6G 2G2. E-mail: arthur.mar@ualberta.ca; Fax: +1-780-492-8231*

**Table S1.** EDX analyses of  $RE_{2-y}Mn_xZn_{4-x}As_4 \cdot n(REAs)$  ( $RE = La-Nd, Sm, Gd; n = 2, 3, 4$ ) crystals. <sup>a</sup>

| Compound                       | No. of analyses | at. % <i>RE</i> | at. % Mn | at. % Zn  | at. % As  |
|--------------------------------|-----------------|-----------------|----------|-----------|-----------|
| $Ce_{3.3}Mn_{1.1}Zn_{2.9}As_6$ | 16              | 25(1)           | 13(1)    | 20(2)     | 41(2)     |
|                                |                 | <i>25</i>       | <i>8</i> | <i>22</i> | <i>45</i> |
| $Pr_{3.5}Zn_4As_6$             | 16              | 29(1)           |          | 30(2)     | 41(2)     |
|                                |                 | <i>26</i>       |          | <i>30</i> | <i>44</i> |
| $Nd_{3.3}Mn_{0.9}Zn_{3.1}As_6$ | 15              | 25(2)           | 4(1)     | 28(1)     | 44(3)     |
|                                |                 | <i>25</i>       | <i>7</i> | <i>23</i> | <i>45</i> |
| $Nd_{4.4}Zn_4As_7$             | 19              | 31(1)           |          | 26(1)     | 43(1)     |
|                                |                 | <i>29</i>       |          | <i>26</i> | <i>45</i> |
| $Sm_{4.4}Zn_4As_7$             | 16              | 33(2)           |          | 26(2)     | 41(2)     |
|                                |                 | <i>29</i>       |          | <i>26</i> | <i>45</i> |
| $Nd_{5.4}Zn_4As_8$             | 16              | 30(1)           |          | 23(1)     | 47(1)     |
|                                |                 | <i>31</i>       |          | <i>23</i> | <i>46</i> |
| $Sm_{5.4}Zn_4As_8$             | 15              | 35(1)           |          | 22(1)     | 43(1)     |
|                                |                 | <i>31</i>       |          | <i>23</i> | <i>46</i> |
| $Sm_{5.3}Mn_{0.6}Zn_{3.4}As_8$ | 16              | 35(2)           | 5(1)     | 20(1)     | 40(3)     |
|                                |                 | <i>31</i>       | <i>3</i> | <i>20</i> | <i>46</i> |
| $Gd_{5.3}Mn_{0.6}Zn_{3.4}As_8$ | 16              | 34(1)           | 6(1)     | 17(1)     | 42(2)     |
|                                |                 | <i>31</i>       | <i>3</i> | <i>20</i> | <i>46</i> |

<sup>a</sup> Expected compositions are indicated in italics.

**Table S2.** Crystallographic data for  $RE_{2-y}Mn_xZn_{4-x}As_4 \cdot n(REAs)$  ( $n = 2, 3, 4$ ).

| Formula                                           | Ce <sub>3.32(1)</sub> Mn <sub>1.1(1)</sub> Zn <sub>2.9(1)</sub> As <sub>6</sub> | Pr <sub>3.46(1)</sub> Zn <sub>4</sub> As <sub>6</sub>              | Nd <sub>3.34(1)</sub> Mn <sub>0.92(6)</sub> Zn <sub>3.08(6)</sub> As <sub>6</sub> | Nd <sub>4.41(1)</sub> Zn <sub>4</sub> As <sub>7</sub>              | Sm <sub>4.39(1)</sub> Zn <sub>4</sub> As <sub>7</sub>              |
|---------------------------------------------------|---------------------------------------------------------------------------------|--------------------------------------------------------------------|-----------------------------------------------------------------------------------|--------------------------------------------------------------------|--------------------------------------------------------------------|
| Formula mass (amu)                                | 1162.27                                                                         | 1197.14                                                            | 1182.07                                                                           | 1420.58                                                            | 1447.46                                                            |
| Space group                                       | $R\bar{3}m1$ (No. 166)                                                          | $R\bar{3}m1$ (No. 166)                                             | $R\bar{3}m1$ (No. 166)                                                            | $P\bar{3}m1$ (No. 164)                                             | $P\bar{3}m1$ (No. 164)                                             |
| $a$ (Å)                                           | 4.218(3)                                                                        | 4.2067(7)                                                          | 4.1788(7)                                                                         | 4.197(3)                                                           | 4.1703(6)                                                          |
| $c$ (Å)                                           | 62.11(4)                                                                        | 62.637(10)                                                         | 61.727(10)                                                                        | 24.204(15)                                                         | 23.981(3)                                                          |
| $V$ (Å <sup>3</sup> )                             | 957.0(13)                                                                       | 959.9(4)                                                           | 933.5(3)                                                                          | 369.2(5)                                                           | 361.19(12)                                                         |
| $Z$                                               | 3                                                                               | 3                                                                  | 3                                                                                 | 1                                                                  | 1                                                                  |
| $\rho_{\text{calcd}}$ (g cm <sup>-3</sup> )       | 6.050                                                                           | 6.213                                                              | 6.308                                                                             | 6.390                                                              | 6.654                                                              |
| Crystal dimensions (mm)                           | 0.05 × 0.03 × 0.02                                                              | 0.09 × 0.04 × 0.02                                                 | 0.04 × 0.03 × 0.02                                                                | 0.08 × 0.05 × 0.03                                                 | 0.06 × 0.06 × 0.02                                                 |
| Radiation                                         | graphite monochromated Mo $K\alpha$ , $\lambda = 0.71073$ Å                     |                                                                    |                                                                                   |                                                                    |                                                                    |
| $\mu$ (Mo $K\alpha$ ) (mm <sup>-1</sup> )         | 33.34                                                                           | 35.57                                                              | 36.14                                                                             | 37.49                                                              | 39.96                                                              |
| Transmission factors                              | 0.277–0.519                                                                     | 0.176–0.558                                                        | 0.334–0.636                                                                       | 0.153–0.452                                                        | 0.207–0.453                                                        |
| $2\theta$ limits                                  | 3.93–51.16°                                                                     | 3.90–66.47°                                                        | 3.96–66.35°                                                                       | 3.37–66.26°                                                        | 3.40–66.44°                                                        |
| Data collected                                    | $-5 \leq h \leq 5,$<br>$-5 \leq k \leq 5,$<br>$-75 \leq l \leq 75$              | $-6 \leq h \leq 6,$<br>$-6 \leq k \leq 6,$<br>$-94 \leq l \leq 95$ | $-6 \leq h \leq 6,$<br>$-6 \leq k \leq 6,$<br>$-93 \leq l \leq 93$                | $-6 \leq h \leq 6,$<br>$-6 \leq k \leq 5,$<br>$-36 \leq l \leq 36$ | $-6 \leq h \leq 6,$<br>$-6 \leq k \leq 6,$<br>$-36 \leq l \leq 36$ |
| No. of data collected                             | 2373                                                                            | 4546                                                               | 4476                                                                              | 4144                                                               | 5171                                                               |
| No. of unique data, including $F_o^2 < 0$         | 297 ( $R_{\text{int}} = 0.080$ )                                                | 564 ( $R_{\text{int}} = 0.031$ )                                   | 546 ( $R_{\text{int}} = 0.049$ )                                                  | 647 ( $R_{\text{int}} = 0.055$ )                                   | 631 ( $R_{\text{int}} = 0.042$ )                                   |
| No. of unique data, with $F_o^2 > 2\sigma(F_o^2)$ | 216                                                                             | 509                                                                | 440                                                                               | 480                                                                | 544                                                                |
| No. of variables                                  | 27                                                                              | 27                                                                 | 28                                                                                | 30                                                                 | 30                                                                 |
| $R(F)$ for $F_o^2 > 2\sigma(F_o^2)$ <sup>a</sup>  | 0.032                                                                           | 0.021                                                              | 0.026                                                                             | 0.029                                                              | 0.028                                                              |

|                                                                     |                                                                       |                                                                      |                                                                                   |                                                                                   |             |
|---------------------------------------------------------------------|-----------------------------------------------------------------------|----------------------------------------------------------------------|-----------------------------------------------------------------------------------|-----------------------------------------------------------------------------------|-------------|
| $R_w(F_o^2)^b$                                                      | 0.058                                                                 | 0.045                                                                | 0.056                                                                             | 0.051                                                                             | 0.067       |
| Goodness of fit                                                     | 1.06                                                                  | 1.16                                                                 | 1.08                                                                              | 1.06                                                                              | 1.11        |
| $(\Delta\rho)_{\max}, (\Delta\rho)_{\min}$ ( $e \text{ \AA}^{-3}$ ) | 1.74, -1.58                                                           | 3.60, -2.78                                                          | 2.05, -2.88                                                                       | 2.75, -3.55                                                                       | 4.07, -3.34 |
| Formula                                                             | Nd <sub>5.43(1)</sub> Zn <sub>4</sub> As <sub>8</sub>                 | Sm <sub>5.40(1)</sub> Zn <sub>4</sub> As <sub>8</sub>                | Sm <sub>5.33(1)</sub> Mn <sub>0.58(1)</sub> Zn <sub>3.42(1)</sub> As <sub>8</sub> | Gd <sub>5.27(1)</sub> Mn <sub>0.62(1)</sub> Zn <sub>3.38(1)</sub> As <sub>8</sub> |             |
| Formula mass (amu)                                                  | 1644.54                                                               | 1672.73                                                              | 1656.80                                                                           | 1682.59                                                                           |             |
| Space group                                                         | $R\bar{3}m1$ (No. 166)                                                | $R\bar{3}m1$ (No. 166)                                               | $R\bar{3}m1$ (No. 166)                                                            | $R\bar{3}m1$ (No. 166)                                                            |             |
| $a$ ( $\text{\AA}$ )                                                | 4.2038(11)                                                            | 4.1689(4)                                                            | 4.1691(9)                                                                         | 4.1398(12)                                                                        |             |
| $c$ ( $\text{\AA}$ )                                                | 82.97(2)                                                              | 82.103(9)                                                            | 81.965(17)                                                                        | 81.17(2)                                                                          |             |
| $V$ ( $\text{\AA}^3$ )                                              | 1269.8(7)                                                             | 1235.8(3)                                                            | 1233.8(6)                                                                         | 1204.8(8)                                                                         |             |
| $Z$                                                                 | 3                                                                     | 3                                                                    | 3                                                                                 | 3                                                                                 |             |
| $\rho_{\text{calcd}}$ ( $\text{g cm}^{-3}$ )                        | 6.452                                                                 | 6.743                                                                | 6.690                                                                             | 6.957                                                                             |             |
| Crystal dimensions (mm)                                             | 0.05 × 0.04 × 0.03                                                    | 0.06 × 0.06 × 0.03                                                   | 0.06 × 0.04 × 0.01                                                                | 0.05 × 0.04 × 0.02                                                                |             |
| Radiation                                                           | graphite monochromated Mo $K\alpha$ , $\lambda = 0.71073 \text{ \AA}$ |                                                                      |                                                                                   |                                                                                   |             |
| $\mu(\text{Mo } K\alpha)$ ( $\text{mm}^{-1}$ )                      | 37.38                                                                 | 40.53                                                                | 39.97                                                                             | 43.15                                                                             |             |
| Transmission factors                                                | 0.284–0.411                                                           | 0.127–0.406                                                          | 0.238–0.675                                                                       | 0.261–0.499                                                                       |             |
| $2\theta$ limits                                                    | 2.95–66.23°                                                           | 2.98–66.04°                                                          | 2.98–66.53°                                                                       | 4.52–66.31°                                                                       |             |
| Data collected                                                      | $-6 \leq h \leq 6,$<br>$-6 \leq k \leq 6,$<br>$-123 \leq l \leq 124$  | $-6 \leq h \leq 6,$<br>$-6 \leq k \leq 6,$<br>$-123 \leq l \leq 123$ | $-6 \leq h \leq 6,$<br>$-6 \leq k \leq 6,$<br>$-124 \leq l \leq 124$              | $-6 \leq h \leq 6,$<br>$-6 \leq k \leq 6,$<br>$-123 \leq l \leq 123$              |             |
| No. of data collected                                               | 5860                                                                  | 5971                                                                 | 6025                                                                              | 5634                                                                              |             |
| No. of unique data, including $F_o^2 < 0$                           | 741 ( $R_{\text{int}} = 0.066$ )                                      | 715 ( $R_{\text{int}} = 0.038$ )                                     | 726 ( $R_{\text{int}} = 0.039$ )                                                  | 705 ( $R_{\text{int}} = 0.051$ )                                                  |             |
| No. of unique data, with $F_o^2 > 2\sigma(F_o^2)$                   | 530                                                                   | 595                                                                  | 621                                                                               | 568                                                                               |             |

|                                                                 |             |             |             |             |
|-----------------------------------------------------------------|-------------|-------------|-------------|-------------|
| No. of variables                                                | 33          | 33          | 33          | 32          |
| $R(F)$ for $F_o^2 > 2\sigma(F_o^2)$ <sup>a</sup>                | 0.040       | 0.026       | 0.025       | 0.033       |
| $R_w(F_o^2)$ <sup>b</sup>                                       | 0.094       | 0.053       | 0.053       | 0.088       |
| Goodness of fit                                                 | 1.08        | 1.12        | 1.11        | 1.09        |
| $(\Delta\rho)_{\max}, (\Delta\rho)_{\min}$ (e Å <sup>-3</sup> ) | 4.37, -3.72 | 2.46, -3.53 | 2.33, -3.34 | 3.99, -5.18 |

$$^a R(F) = \sum |F_o| - |F_c| / \sum |F_o|.$$

$$^b R_w(F_o^2) = [\sum [w(F_o^2 - F_c^2)^2] / \sum w F_o^4]^{1/2}; w^{-1} = [\sigma^2(F_o^2) + (Ap)^2 + Bp], \text{ where } p = [\max(F_o^2, 0) + 2F_c^2] / 3.$$

**Table S3.** Atomic coordinates and equivalent isotropic displacement parameters for  $RE_{2-y}Mn_xZn_{4-x}As_4 \cdot n(REAs)$  ( $n = 2, 3, 4$ ).

| Atom                                       | Wyckoff position | Occupancy              | $x$ | $y$ | $z$         | $U_{eq} (\text{\AA}^2)^a$ |
|--------------------------------------------|------------------|------------------------|-----|-----|-------------|---------------------------|
| $Ce_{3.32(1)}Mn_{1.1(1)}Zn_{2.9(1)}As_6$   |                  |                        |     |     |             |                           |
| Ce1                                        | 6c               | 1                      | 0   | 0   | 0.39010(2)  | 0.0187(4)                 |
| Ce2                                        | 3b               | 0.323(9)               | 0   | 0   | 1/2         | 0.038(3)                  |
| Ce3                                        | 3a               | 1                      | 0   | 0   | 0           | 0.0170(5)                 |
| M1a                                        | 6c               | 0.721(7) Zn            | 0   | 0   | 0.13028(8)  | 0.0332(13)                |
| M1b                                        | 6c               | 0.279(7) Mn            | 0   | 0   | 0.1478(3)   | 0.0332(13)                |
| M2                                         | 6c               | 0.75(6) Zn, 0.25(6) Mn | 0   | 0   | 0.23276(5)  | 0.0265(13)                |
| As1                                        | 6c               | 1                      | 0   | 0   | 0.08679(4)  | 0.0186(6)                 |
| As2                                        | 6c               | 1                      | 0   | 0   | 0.19204(5)  | 0.0271(7)                 |
| As3                                        | 6c               | 1                      | 0   | 0   | 0.30451(4)  | 0.0173(6)                 |
| $Pr_{3.46(1)}Zn_4As_6$                     |                  |                        |     |     |             |                           |
| Pr1                                        | 6c               | 1                      | 0   | 0   | 0.38893(2)  | 0.0079(1)                 |
| Pr2                                        | 3b               | 0.461(3)               | 0   | 0   | 1/2         | 0.0105(3)                 |
| Pr3                                        | 3a               | 1                      | 0   | 0   | 0           | 0.0072(1)                 |
| M1a                                        | 6c               | 0.879(3) Zn            | 0   | 0   | 0.12902(2)  | 0.0237(3)                 |
| M1b                                        | 6c               | 0.121(3) Zn            | 0   | 0   | 0.14966(15) | 0.0237(3)                 |
| M2                                         | 6c               | 1 Zn                   | 0   | 0   | 0.23482(2)  | 0.0165(2)                 |
| As1                                        | 6c               | 1                      | 0   | 0   | 0.08505(2)  | 0.0088(2)                 |
| As2                                        | 6c               | 1                      | 0   | 0   | 0.19442(2)  | 0.0116(2)                 |
| As3                                        | 6c               | 1                      | 0   | 0   | 0.30502(2)  | 0.0079(1)                 |
| $Nd_{3.34(1)}Mn_{0.92(6)}Zn_{3.08(6)}As_6$ |                  |                        |     |     |             |                           |
| Nd1                                        | 6c               | 1                      | 0   | 0   | 0.38917(2)  | 0.0106(1)                 |
| Nd2                                        | 3b               | 0.339(4)               | 0   | 0   | 1/2         | 0.0234(8)                 |
| Nd3                                        | 3a               | 1                      | 0   | 0   | 0           | 0.0092(2)                 |
| M1a                                        | 6c               | 0.722(4) Zn            | 0   | 0   | 0.12967(3)  | 0.0259(5)                 |
| M1b                                        | 6c               | 0.279(4) Mn            | 0   | 0   | 0.14757(12) | 0.0259(5)                 |
| M2                                         | 6c               | 0.82(3) Zn, 0.18(3) Mn | 0   | 0   | 0.23396(2)  | 0.0186(4)                 |
| As1                                        | 6c               | 1                      | 0   | 0   | 0.08504(2)  | 0.0119(2)                 |
| As2                                        | 6c               | 1                      | 0   | 0   | 0.19321(2)  | 0.0169(2)                 |
| As3                                        | 6c               | 1                      | 0   | 0   | 0.30506(2)  | 0.0097(2)                 |
| $Nd_{4.41(1)}Zn_4As_7$                     |                  |                        |     |     |             |                           |
| Nd1                                        | 2d               | 1                      | 1/3 | 2/3 | 0.07145(2)  | 0.0072(1)                 |
| Nd2                                        | 2c               | 1                      | 0   | 0   | 0.21498(2)  | 0.0082(1)                 |

|                                                       |            |             |     |     |             |           |
|-------------------------------------------------------|------------|-------------|-----|-----|-------------|-----------|
| Nd3                                                   | 1 <i>b</i> | 0.410(4)    | 0   | 0   | 1/2         | 0.0112(6) |
| M1a                                                   | 2 <i>d</i> | 0.830(4) Zn | 1/3 | 2/3 | 0.40538(10) | 0.0279(5) |
| M1b                                                   | 2 <i>d</i> | 0.170(4) Zn | 1/3 | 2/3 | 0.4550(5)   | 0.0279(5) |
| M2                                                    | 2 <i>d</i> | 1 Zn        | 1/3 | 2/3 | 0.67457(6)  | 0.0169(3) |
| As1                                                   | 2 <i>d</i> | 1           | 1/3 | 2/3 | 0.28933(5)  | 0.0087(2) |
| As2                                                   | 2 <i>d</i> | 1           | 1/3 | 2/3 | 0.57088(5)  | 0.0116(2) |
| As3                                                   | 2 <i>d</i> | 1           | 1/3 | 2/3 | 0.85542(4)  | 0.0067(2) |
| As4                                                   | 1 <i>a</i> | 1           | 0   | 0   | 0           | 0.0067(3) |
| Sm <sub>4.39(1)</sub> Zn <sub>4</sub> As <sub>7</sub> |            |             |     |     |             |           |
| Sm1                                                   | 2 <i>d</i> | 1           | 1/3 | 2/3 | 0.07017(2)  | 0.0085(1) |
| Sm2                                                   | 2 <i>c</i> | 1           | 0   | 0   | 0.21375(2)  | 0.0094(1) |
| Sm3                                                   | 1 <i>b</i> | 0.385(4)    | 0   | 0   | 1/2         | 0.0127(6) |
| M1a                                                   | 2 <i>d</i> | 0.804(4) Zn | 1/3 | 2/3 | 0.40566(10) | 0.0313(5) |
| M1b                                                   | 2 <i>d</i> | 0.196(4) Zn | 1/3 | 2/3 | 0.4551(4)   | 0.0313(5) |
| M2                                                    | 2 <i>d</i> | 1 Zn        | 1/3 | 2/3 | 0.67521(6)  | 0.0183(3) |
| As1                                                   | 2 <i>d</i> | 1           | 1/3 | 2/3 | 0.28737(4)  | 0.0101(2) |
| As2                                                   | 2 <i>d</i> | 1           | 1/3 | 2/3 | 0.57084(5)  | 0.0135(2) |
| As3                                                   | 2 <i>d</i> | 1           | 1/3 | 2/3 | 0.85646(4)  | 0.0083(2) |
| As4                                                   | 1 <i>a</i> | 1           | 0   | 0   | 0           | 0.0082(3) |
| Nd <sub>5.43(1)</sub> Zn <sub>4</sub> As <sub>8</sub> |            |             |     |     |             |           |
| Nd1                                                   | 6 <i>c</i> | 1           | 0   | 0   | 0.29167(2)  | 0.0072(2) |
| Nd2                                                   | 6 <i>c</i> | 1           | 0   | 0   | 0.41684(2)  | 0.0084(2) |
| Nd3                                                   | 3 <i>b</i> | 0.429(5)    | 0   | 0   | 1/2         | 0.0088(7) |
| Nd4                                                   | 3 <i>a</i> | 1           | 0   | 0   | 0           | 0.0069(2) |
| M1                                                    | 6 <i>c</i> | 1 Zn        | 0   | 0   | 0.11573(2)  | 0.0182(5) |
| M2a                                                   | 6 <i>c</i> | 0.848(5) Zn | 0   | 0   | 0.19440(4)  | 0.0268(7) |
| M2b                                                   | 6 <i>c</i> | 0.152(5) Zn | 0   | 0   | 0.1799(2)   | 0.0268(7) |
| As1                                                   | 6 <i>c</i> | 1           | 0   | 0   | 0.06309(2)  | 0.0071(3) |
| As2                                                   | 6 <i>c</i> | 1           | 0   | 0   | 0.14598(2)  | 0.0121(3) |
| As3                                                   | 6 <i>c</i> | 1           | 0   | 0   | 0.22807(2)  | 0.0092(3) |
| As4                                                   | 6 <i>c</i> | 1           | 0   | 0   | 0.35437(2)  | 0.0072(3) |
| Sm <sub>5.40(1)</sub> Zn <sub>4</sub> As <sub>8</sub> |            |             |     |     |             |           |
| Sm1                                                   | 6 <i>c</i> | 1           | 0   | 0   | 0.29186(2)  | 0.0072(1) |
| Sm2                                                   | 6 <i>c</i> | 1           | 0   | 0   | 0.41644(2)  | 0.0082(1) |
| Sm3                                                   | 3 <i>b</i> | 0.400(4)    | 0   | 0   | 1/2         | 0.0113(5) |
| Sm4                                                   | 3 <i>a</i> | 1           | 0   | 0   | 0           | 0.0070(1) |
| M1                                                    | 6 <i>c</i> | 1 Zn        | 0   | 0   | 0.11549(2)  | 0.0169(3) |

|                                                                                   |           |             |   |   |             |            |
|-----------------------------------------------------------------------------------|-----------|-------------|---|---|-------------|------------|
| <i>M2a</i>                                                                        | <i>6c</i> | 0.819(4) Zn | 0 | 0 | 0.19437(3)  | 0.0286(5)  |
| <i>M2b</i>                                                                        | <i>6c</i> | 0.181(4) Zn | 0 | 0 | 0.17988(12) | 0.0286(5)  |
| As1                                                                               | <i>6c</i> | 1           | 0 | 0 | 0.06272(2)  | 0.0068(2)  |
| As2                                                                               | <i>6c</i> | 1           | 0 | 0 | 0.14601(2)  | 0.0122(2)  |
| As3                                                                               | <i>6c</i> | 1           | 0 | 0 | 0.22865(2)  | 0.0088(2)  |
| As4                                                                               | <i>6c</i> | 1           | 0 | 0 | 0.35424(2)  | 0.0070(2)  |
| <b>Sm<sub>5,33(1)</sub>Mn<sub>0,58(1)</sub>Zn<sub>3,42(1)</sub>As<sub>8</sub></b> |           |             |   |   |             |            |
| Sm1                                                                               | <i>6c</i> | 1           | 0 | 0 | 0.29173(2)  | 0.0089(1)  |
| Sm2                                                                               | <i>6c</i> | 1           | 0 | 0 | 0.41670(2)  | 0.0104(1)  |
| Sm3                                                                               | <i>3b</i> | 0.332(4)    | 0 | 0 | 1/2         | 0.0212(7)  |
| Sm4                                                                               | <i>3a</i> | 1           | 0 | 0 | 0           | 0.0088(1)  |
| <i>M1</i>                                                                         | <i>6c</i> | 1 Zn        | 0 | 0 | 0.11598(2)  | 0.0197(3)  |
| <i>M2a</i>                                                                        | <i>6c</i> | 0.710(4) Zn | 0 | 0 | 0.19445(3)  | 0.0255(4)  |
| <i>M2b</i>                                                                        | <i>6c</i> | 0.290(4) Mn | 0 | 0 | 0.18086(9)  | 0.0255(4)  |
| As1                                                                               | <i>6c</i> | 1           | 0 | 0 | 0.06290(2)  | 0.0086(2)  |
| As2                                                                               | <i>6c</i> | 1           | 0 | 0 | 0.14657(2)  | 0.0157(2)  |
| As3                                                                               | <i>6c</i> | 1           | 0 | 0 | 0.22834(2)  | 0.0107(2)  |
| As4                                                                               | <i>6c</i> | 1           | 0 | 0 | 0.35430(2)  | 0.0089(2)  |
| <b>Gd<sub>5,27(1)</sub>Mn<sub>0,62(1)</sub>Zn<sub>3,38(1)</sub>As<sub>8</sub></b> |           |             |   |   |             |            |
| Gd1                                                                               | <i>6c</i> | 1           | 0 | 0 | 0.29192(2)  | 0.0112(2)  |
| Gd2                                                                               | <i>6c</i> | 1           | 0 | 0 | 0.41624(2)  | 0.0134(2)  |
| Gd3                                                                               | <i>3b</i> | 0.271(5)    | 0 | 0 | 1/2         | 0.0292(13) |
| Gd4                                                                               | <i>3a</i> | 1           | 0 | 0 | 0           | 0.0109(2)  |
| <i>M1</i>                                                                         | <i>6c</i> | 1 Zn        | 0 | 0 | 0.11600(2)  | 0.0252(4)  |
| <i>M2a</i>                                                                        | <i>6c</i> | 0.692(5) Zn | 0 | 0 | 0.19511(4)  | 0.0276(6)  |
| <i>M2b</i>                                                                        | <i>6c</i> | 0.308(5) Mn | 0 | 0 | 0.18112(11) | 0.0276(6)  |
| As1                                                                               | <i>6c</i> | 1           | 0 | 0 | 0.06269(2)  | 0.0108(3)  |
| As2                                                                               | <i>6c</i> | 1           | 0 | 0 | 0.14706(2)  | 0.0189(3)  |
| As3                                                                               | <i>6c</i> | 1           | 0 | 0 | 0.22855(2)  | 0.0128(3)  |
| As4                                                                               | <i>6c</i> | 1           | 0 | 0 | 0.35423(2)  | 0.0107(3)  |

<sup>a</sup>  $U_{eq}$  is defined as one-third of the trace of the orthogonalized  $U_{ij}$  tensor.



**Table S4.** Interatomic distances (Å) for  $RE_{2-y}Mn_xZn_{4-x}As_4 \cdot n(REAs)$  ( $n = 2, 3, 4$ ).

|                              | $Ce_{3.32(1)}Mn_{1.1(1)}Zn_{2.9(1)}As_6$ | $Pr_{3.46(1)}Zn_4As_6$ | $Nd_{3.34(1)}Mn_{0.92(6)}Zn_{3.08(6)}As_6$ |
|------------------------------|------------------------------------------|------------------------|--------------------------------------------|
| <i>RE1</i> –As3 (×3)         | 2.991(2)                                 | 2.970(1)               | 2.952(1)                                   |
| <i>RE1</i> –As1 (×3)         | 3.067(2)                                 | 3.050(1)               | 3.012(1)                                   |
| <i>RE1</i> – <i>M2</i> (×3)  | 3.652(3)                                 | 3.623(1)               | 3.611(1)                                   |
| <i>RE2</i> –As2 (×6)         | 2.901(2)                                 | 2.987(1)               | 2.917(1)                                   |
| <i>RE2</i> – <i>M1b</i> (×6) | 2.702(8)                                 | 2.652(4)               | 2.685(3)                                   |
| <i>RE2</i> – <i>M1a</i> (×6) | 3.324(4)                                 | 3.385(1)               | 3.322(2)                                   |
| <i>RE3</i> –As3 (×6)         | 3.023(2)                                 | 3.008(1)               | 2.978(1)                                   |
| <i>M1a</i> –As2 (×3)         | 2.530(2)                                 | 2.507(1)               | 2.497(1)                                   |
| <i>M1a</i> –As1              | 2.698(6)                                 | 2.754(2)               | 2.755(2)                                   |
| <i>M1a</i> – <i>M2</i> (×3)  | 3.053(4)                                 | 3.090(1)               | 3.053(2)                                   |
| <i>M1b</i> –As2 (×3)         | 2.469(3)                                 | 2.520(3)               | 2.456(2)                                   |
| <i>M1b</i> –As2              | 2.747(18)                                | 2.804(10)              | 2.817(8)                                   |
| <i>M1b</i> – <i>M1b</i> (×3) | 3.38(2)                                  | 3.231(13)              | 3.374(10)                                  |
| <i>M2</i> –As2               | 2.529(5)                                 | 2.530(1)               | 2.515(2)                                   |
| <i>M2</i> –As1 (×3)          | 2.581(2)                                 | 2.571(1)               | 2.570(1)                                   |
| <i>M2</i> – <i>M1a</i> (×3)  | 3.053(4)                                 | 3.090(1)               | 3.053(2)                                   |
|                              | $Nd_{4.41(1)}Zn_4As_7$                   | $Sm_{4.39(1)}Zn_4As_7$ |                                            |
| <i>RE1</i> –As4 (×3)         | 2.977(1)                                 | 2.950(1)               |                                            |
| <i>RE1</i> –As3 (×3)         | 3.001(2)                                 | 2.969(1)               |                                            |
| <i>RE2</i> –As3 (×3)         | 2.962(2)                                 | 2.938(1)               |                                            |
| <i>RE2</i> –As1 (×3)         | 3.018(2)                                 | 2.986(1)               |                                            |
| <i>RE2</i> – <i>M2</i> (×3)  | 3.608(2)                                 | 3.590(1)               |                                            |
| <i>RE3</i> –As2 (×6)         | 2.969(2)                                 | 2.947(1)               |                                            |
| <i>RE3</i> – <i>M1b</i> (×6) | 2.657(5)                                 | 2.638(4)               |                                            |
| <i>RE3</i> – <i>M1a</i> (×6) | 3.334(2)                                 | 3.304(2)               |                                            |
| <i>M1a</i> –As2 (×3)         | 2.490(2)                                 | 2.473(1)               |                                            |
| <i>M1a</i> –As1              | 2.809(3)                                 | 2.837(3)               |                                            |
| <i>M1a</i> – <i>M2</i> (×3)  | 3.101(2)                                 | 3.092(2)               |                                            |
| <i>M1b</i> –As2 (×3)         | 2.502(3)                                 | 2.487(3)               |                                            |
| <i>M1b</i> –As2              | 2.805(12)                                | 2.776(11)              |                                            |
| <i>M1b</i> – <i>M1b</i> (×3) | 3.259(16)                                | 3.231(14)              |                                            |
| <i>M2</i> –As2               | 2.510(2)                                 | 2.503(2)               |                                            |
| <i>M2</i> –As1 (×3)          | 2.576(2)                                 | 2.570(1)               |                                            |

| <i>M2-M1a</i> (×3)  | 3.101(2)                                                                          | 3.092(2)                                                                          |
|---------------------|-----------------------------------------------------------------------------------|-----------------------------------------------------------------------------------|
|                     | Nd <sub>5.43(1)</sub> Zn <sub>4</sub> As <sub>8</sub>                             | Sm <sub>5.40(1)</sub> Zn <sub>4</sub> As <sub>8</sub>                             |
| <i>RE1-As4</i> (×3) | 2.970(1)                                                                          | 2.940(1)                                                                          |
| <i>RE1-As1</i> (×3) | 3.008(1)                                                                          | 2.973(1)                                                                          |
| <i>RE2-As1</i> (×3) | 2.960(1)                                                                          | 2.931(1)                                                                          |
| <i>RE2-As3</i> (×3) | 3.025(1)                                                                          | 2.989(1)                                                                          |
| <i>RE2-M1</i> (×3)  | 3.611(2)                                                                          | 3.586(1)                                                                          |
| <i>RE3-As2</i> (×6) | 2.973(1)                                                                          | 2.944(1)                                                                          |
| <i>RE3-M2b</i> (×6) | 2.665(7)                                                                          | 2.640(4)                                                                          |
| <i>RE3-M2a</i> (×6) | 3.344(2)                                                                          | 3.312(2)                                                                          |
| <i>RE4-As4</i> (×6) | 2.989(1)                                                                          | 2.956(1)                                                                          |
| <i>M1-As2</i>       | 2.510(3)                                                                          | 2.506(2)                                                                          |
| <i>M1-As3</i> (×3)  | 2.578(1)                                                                          | 2.565(1)                                                                          |
| <i>M1-M2a</i> (×3)  | 3.098(2)                                                                          | 3.084(2)                                                                          |
| <i>M2a-As2</i> (×3) | 2.496(1)                                                                          | 2.475(1)                                                                          |
| <i>M2a-As2</i>      | 2.793(3)                                                                          | 2.815(2)                                                                          |
| <i>M2a-M1</i> (×3)  | 3.098(2)                                                                          | 3.084(2)                                                                          |
| <i>M2b-As2</i> (×3) | 2.504(4)                                                                          | 2.483(2)                                                                          |
| <i>M2b-As2</i>      | 2.818(17)                                                                         | 2.780(10)                                                                         |
| <i>M2b-M2b</i> (×3) | 3.28(2)                                                                           | 3.240(13)                                                                         |
|                     | Sm <sub>5.33(1)</sub> Mn <sub>0.58(1)</sub> Zn <sub>3.42(1)</sub> As <sub>8</sub> | Gd <sub>5.27(1)</sub> Mn <sub>0.62(1)</sub> Zn <sub>3.38(1)</sub> As <sub>8</sub> |
| <i>RE1-As4</i> (×3) | 2.942(1)                                                                          | 2.913(1)                                                                          |
| <i>RE1-As1</i> (×3) | 2.973(1)                                                                          | 2.949(1)                                                                          |
| <i>RE2-As1</i> (×3) | 2.934(1)                                                                          | 2.899(1)                                                                          |
| <i>RE2-As3</i> (×3) | 2.989(1)                                                                          | 2.978(1)                                                                          |
| <i>RE2-M1</i> (×3)  | 3.598(1)                                                                          | 3.596(2)                                                                          |
| <i>RE3-As2</i> (×6) | 2.917(1)                                                                          | 2.871(1)                                                                          |
| <i>RE3-M2b</i> (×6) | 2.674(3)                                                                          | 2.662(4)                                                                          |
| <i>RE3-M2a</i> (×6) | 3.314(2)                                                                          | 3.323(2)                                                                          |
| <i>RE4-As4</i> (×6) | 2.958(1)                                                                          | 2.931(1)                                                                          |
| <i>M1-As2</i>       | 2.507(2)                                                                          | 2.522(2)                                                                          |
| <i>M1-As3</i> (×3)  | 2.570(1)                                                                          | 2.558(1)                                                                          |
| <i>M1-M2a</i> (×3)  | 3.053(2)                                                                          | 2.995(2)                                                                          |
| <i>M2a-As2</i> (×3) | 2.488(1)                                                                          | 2.495(1)                                                                          |
| <i>M2a-As2</i>      | 2.778(3)                                                                          | 2.715(3)                                                                          |

|                          |           |           |
|--------------------------|-----------|-----------|
| $M2a-M1$ ( $\times 3$ )  | 3.052(2)  | 2.995(2)  |
| $M2b-As2$ ( $\times 3$ ) | 2.455(2)  | 2.426(2)  |
| $M2b-As2$                | 2.811(7)  | 2.764(9)  |
| $M2b-M2b$ ( $\times 3$ ) | 3.348(10) | 3.349(13) |

---

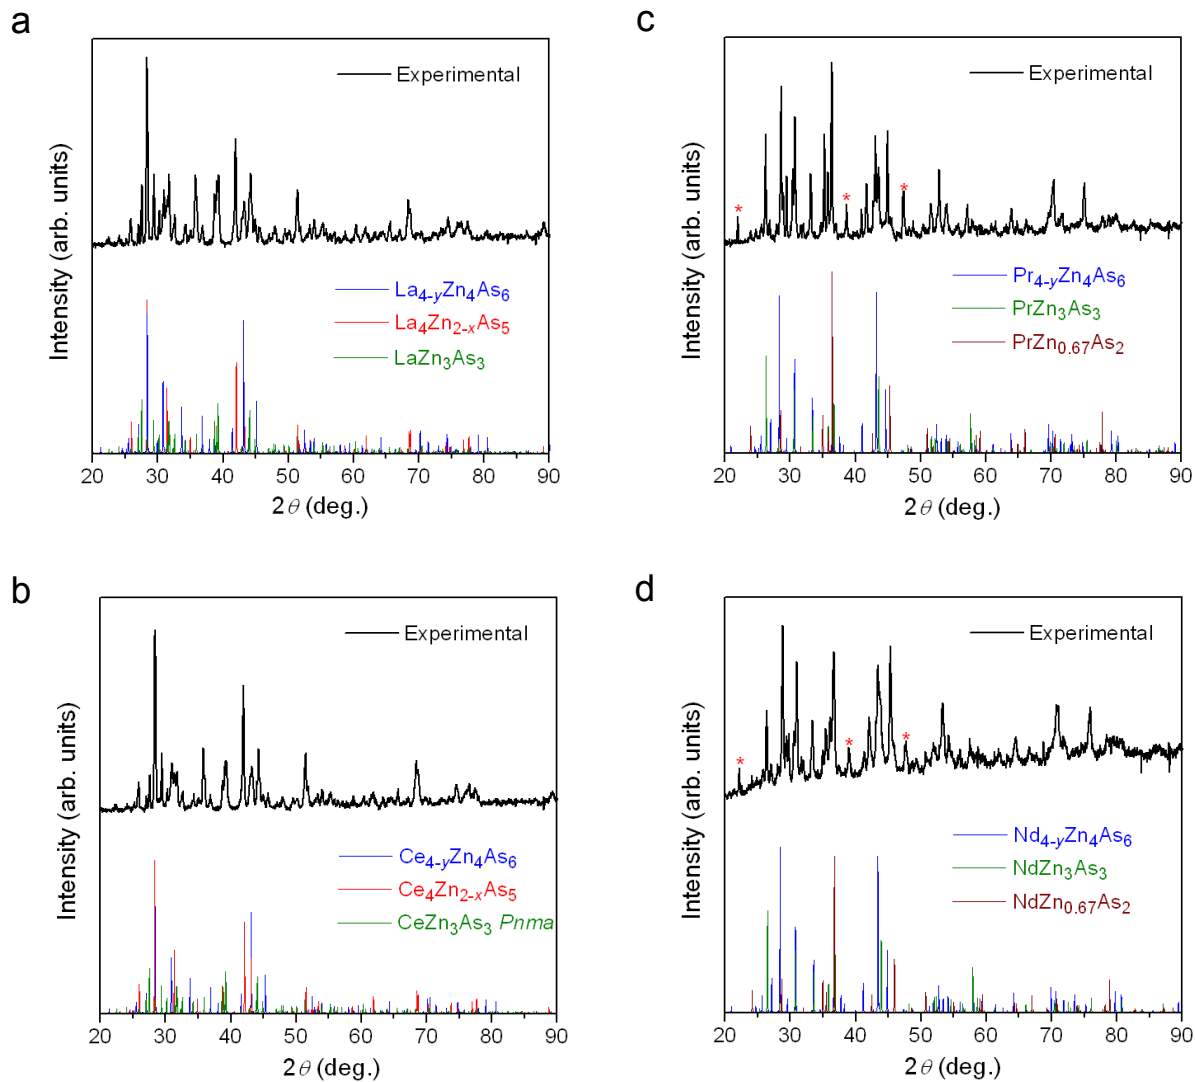

**Figure S1.** Powder XRD patterns for  $RE_{4-y}Zn_4As_6$  ( $RE = La-Nd$ ).

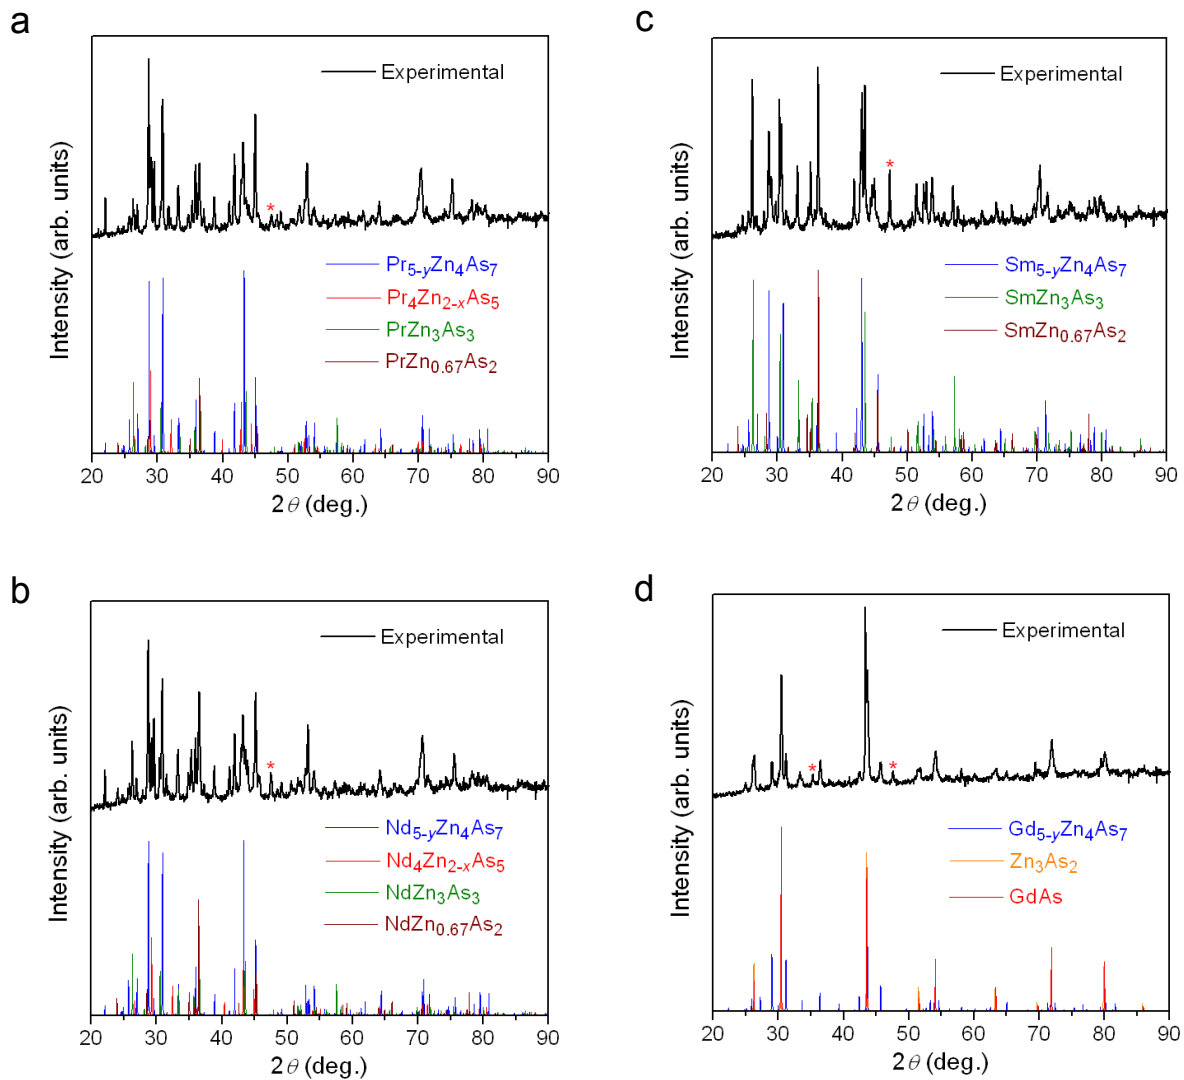

**Figure S2.** Powder XRD patterns for  $\text{RE}_{5-y}\text{Zn}_4\text{As}_7$  ( $\text{RE} = \text{Pr}, \text{Nd}, \text{Sm}, \text{Gd}$ ).

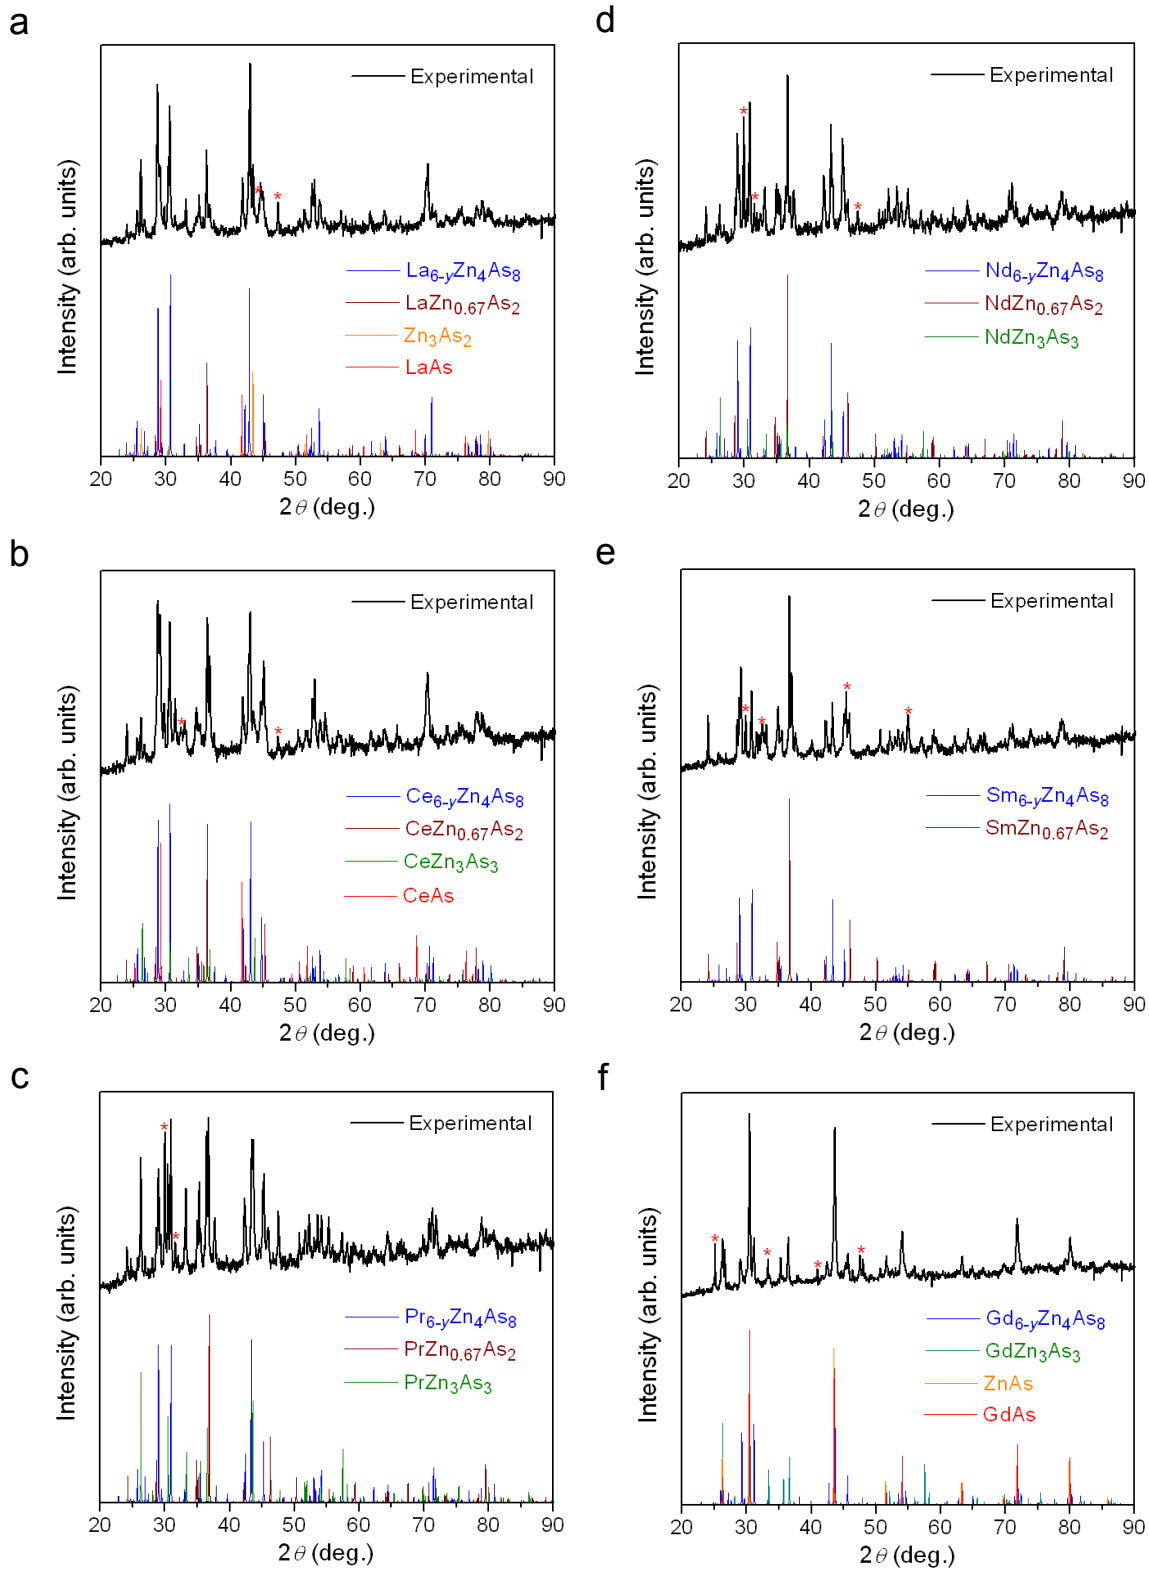

**Figure S3.** Powder XRD patterns for  $RE_{6-y}Zn_4As_8$  ( $RE = La-Nd, Sm, Gd$ ).
